# Supplementary material
Source: Springer Nature journal article supplement (https://www.springermedizin.de/resource/supplementary/12885_2008_1306_MOESM1_ESM.pdf/9471708)

**a) All**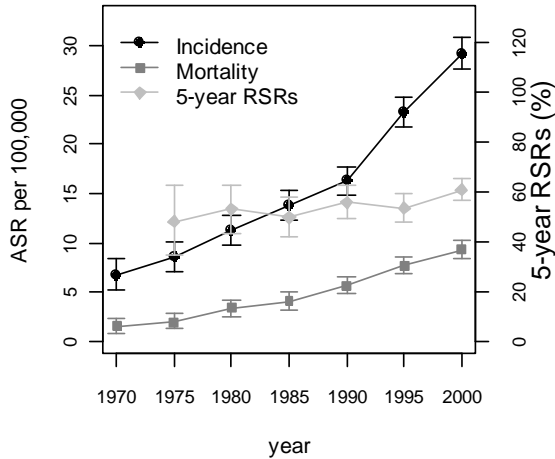**b) Chinese**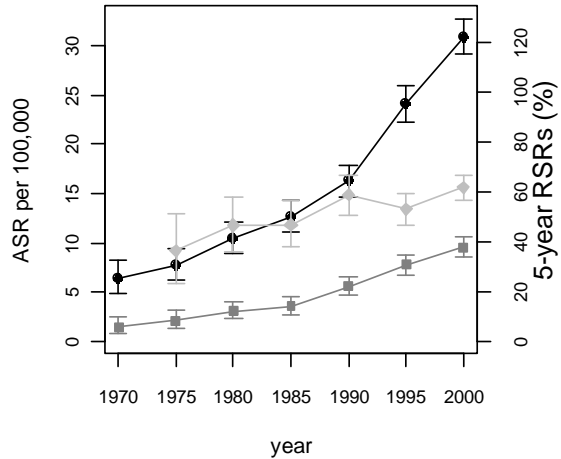**c) Malays**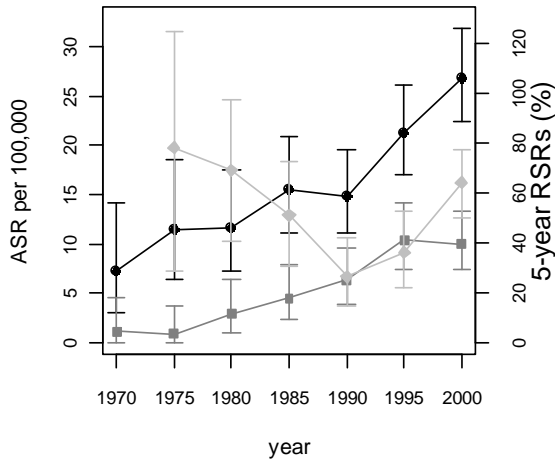**d) Indians**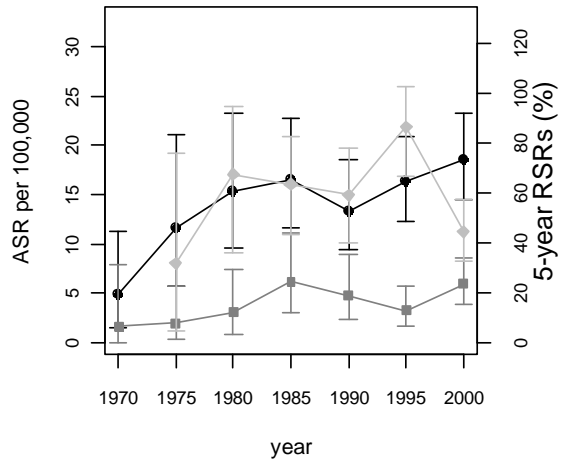

Supplement: MOESM1 [file 9471708]
